# Supplementary material for: Varying levels of X chromosome coalescence in female somatic cells alters the balance of X-linked dosage compensation and is implicated in female-dominant systemic lupus erythematosus
Source: PubMed Central journal article supplement (PMC6541617; doi:10.1038/s41598-019-44229-9), 2019-05-29
Supplement: 41598_2019_44229_MOESM1_ESM.pdf [file 41598_2019_44229_MOESM1_ESM.pdf]

**Varying levels of X chromosome coalescence in female somatic cells alters the balance of X-linked dosage compensation and is implicated in female-dominant systemic lupus erythematosus**

*Agnieszka I. Laskowski<sup>1</sup>, Daniel S. Neems<sup>1</sup>, Kyle Laster<sup>1</sup>, Chelsea Strojny-Okyere<sup>1</sup>, Ellen L. Rice<sup>1</sup>, Iwona M. Konieczna<sup>2</sup>, Jessica H. Voss<sup>2</sup>, James M. Mathew<sup>2</sup>, Joseph R. Leventhal<sup>2</sup>, Rosalind Ramsey-Goldman<sup>2</sup>, Erica D. Smith<sup>1</sup>, and Steven T. Kosak<sup>3\*</sup>*

<sup>1</sup>Department of Cell and Molecular Biology, <sup>2</sup>Comprehensive Transplant Center, Department of Medicine, Surgery Division, <sup>3</sup>Department of Medicine, Rheumatology Division, Feinberg School of Medicine, Northwestern University, Chicago, IL 60611

\*corresponding author, [s-kosak@northwestern.edu](mailto:s-kosak@northwestern.edu), 312-503-9582

## Supplemental Figures

### Supplemental Figure 1

**a**

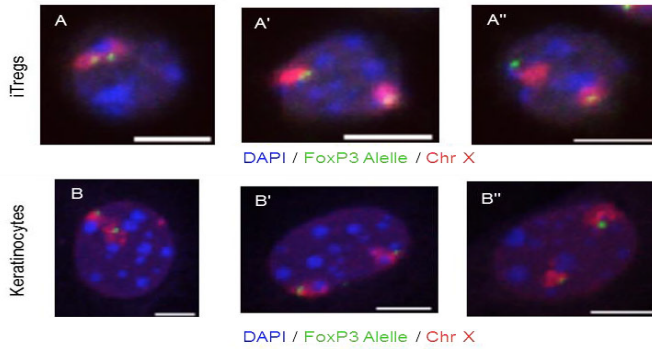

**b**

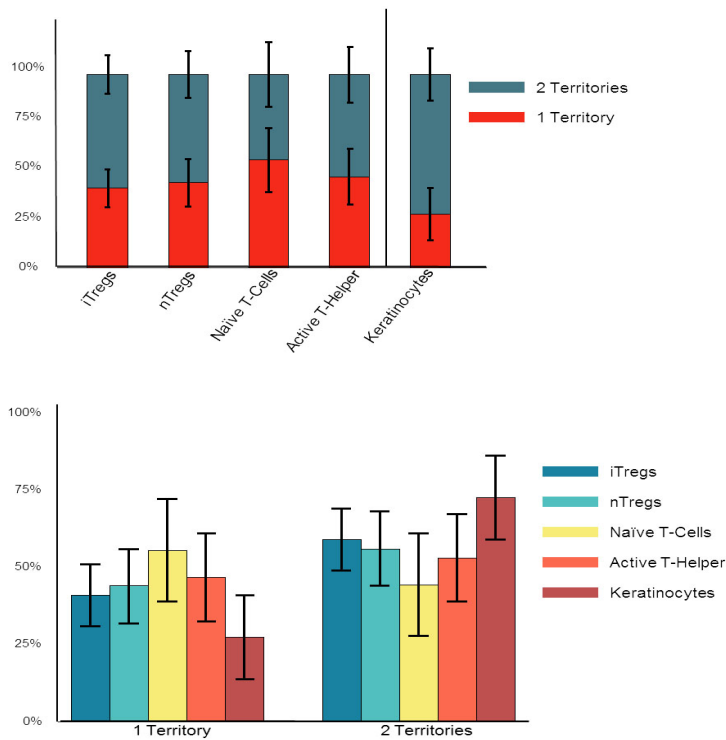

**Supplemental Figure 1. (a)** 3D maximum intensity projections of mouse induced Tregs (upper panel) and keratinocyte (lower panel) nuclei (blue) with FOXP3 (green) and chromosome X (red) labeled during X separation and coalescence. **(b)** 3D analysis of chromosome X coalescence frequency in various mouse cell types. Values presented as mean error bars are 95% confidence intervals of the mean,  $N > 41$  nuclei. Values are a single biological replicate.

## Supplemental Figure 2

**a**

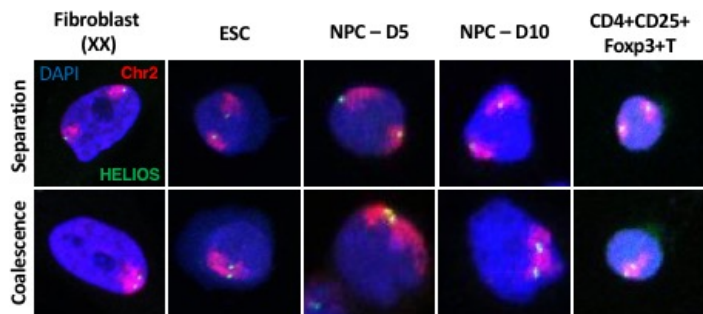

**b**

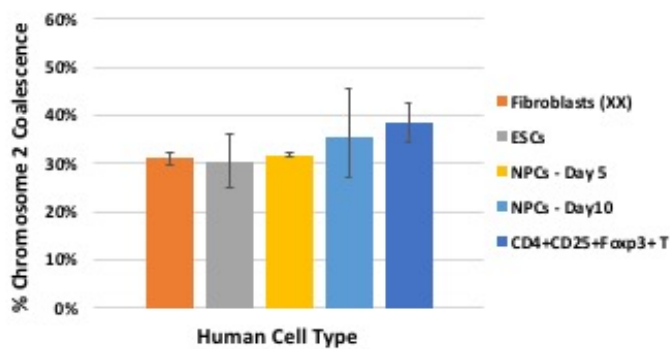

**Supplemental Figure 2. (a)** 3D DNA FISH maximum intensity projections of human nuclei labeled with DAPI (blue), chromosome 2 (red), and chromosome 2 gene loci, HELIOS (green) in various human cell types containing two chromosome 2, during separation (upper panel) or coalescence (lower panel). **(b)** 3D analysis of chromosome 2 coalescence frequency in various human female cell types. Values presented as mean  $\pm$  standard deviation. \* $P < 0.05$ , \*\* $P < 0.01$ , Student's  $t$ -test. Each column represents approximately 150-200 nuclei analyzed.

### Supplemental Figure 3

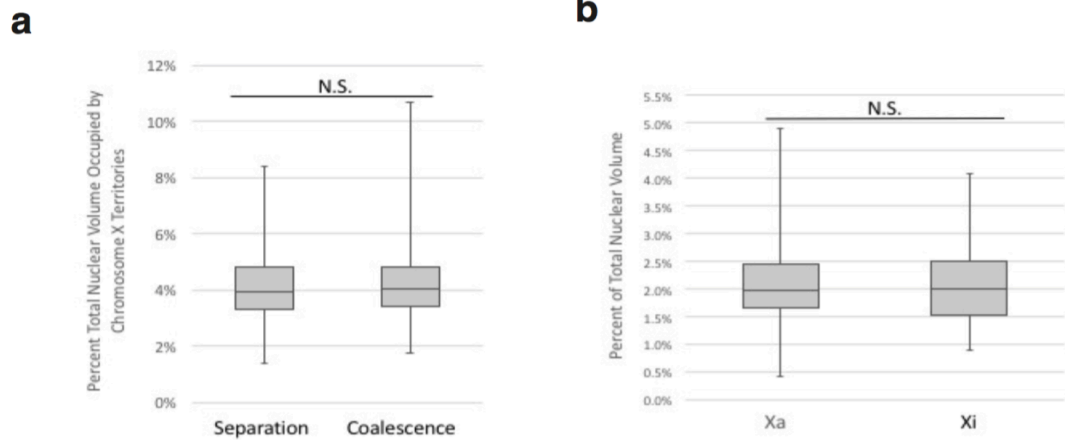

**Supplemental Figure 3. (a)** Percent total IMR- nuclear volume occupied by X chromosomes during either separation or coalescence. \* $P < 0.05$ , \*\* $P < 0.01$ , Student's  $t$ -test. Each whisker-box plot represents 100 nuclei analyzed. **(b)** Percent total IMR-90 nuclear volume occupied by either the Xi or Xa during chromosome X separation. \* $P < 0.05$ , \*\* $P < 0.01$ , \*\*\* $P < 0.001$ , Student's  $t$ -test. A total of 100 nuclei were analyzed. N.S. = Not Significant.
